# Supplementary material
Source: HighWire-hosted journal article supplement (https://erj.ersjournals.com/content/56/1/2001560)
Supplement: inline-supplementary-material-1 [file inline-supplementary-material-1.pdf]

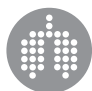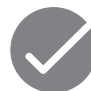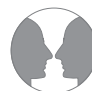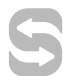

SHAREABLE PDF

# Could the smoking gun in the fight against COVID-19 be the (rh)ACE-2?

Dhamend Lutchman 

**Affiliation:** Point Cook, Melbourne, Australia.

**Correspondence:** Dhamend Lutchman, Point Cook, Melbourne, Australia 3030. E-mail: dlutchman@yahoo.com

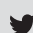

@ERSpublications

**Exogenous supplement of recombinant human (rh)ACE-2 might be a brilliant idea in the treatment of COVID-19. Soluble ACE-2 might impact viral spread, since binding to soluble receptor has been shown to block SARS-CoV-2 entry.** <https://bit.ly/3bsUKO2>

**Cite this article as:** Lutchman D. Could the smoking gun in the fight against COVID-19 be the (rh)ACE-2?. *Eur Respir J* 2020; 56: 2001560 [<https://doi.org/10.1183/13993003.01560-2020>].

This single-page version can be shared freely online.

*To the Editor:*

Two interesting publications in the *European Respiratory Journal* recently by Russo *et al.* [1] and Leung *et al.* [2] discuss the possible role of nicotine in this pandemic and the “furious pursuit for better therapeutics”.
